# Supplementary material for: Effects of interferons and double-stranded RNA on human prostate cancer cell apoptosis
Source: PubMed Central journal article supplement (PMC4770765; doi:10.18632/oncotarget.5508), 2015-10-01
Supplement: oncotarget-06-39184-s001.pdf [file oncotarget-06-39184-s001.pdf]

## SUPPLEMENTARY FIGURES

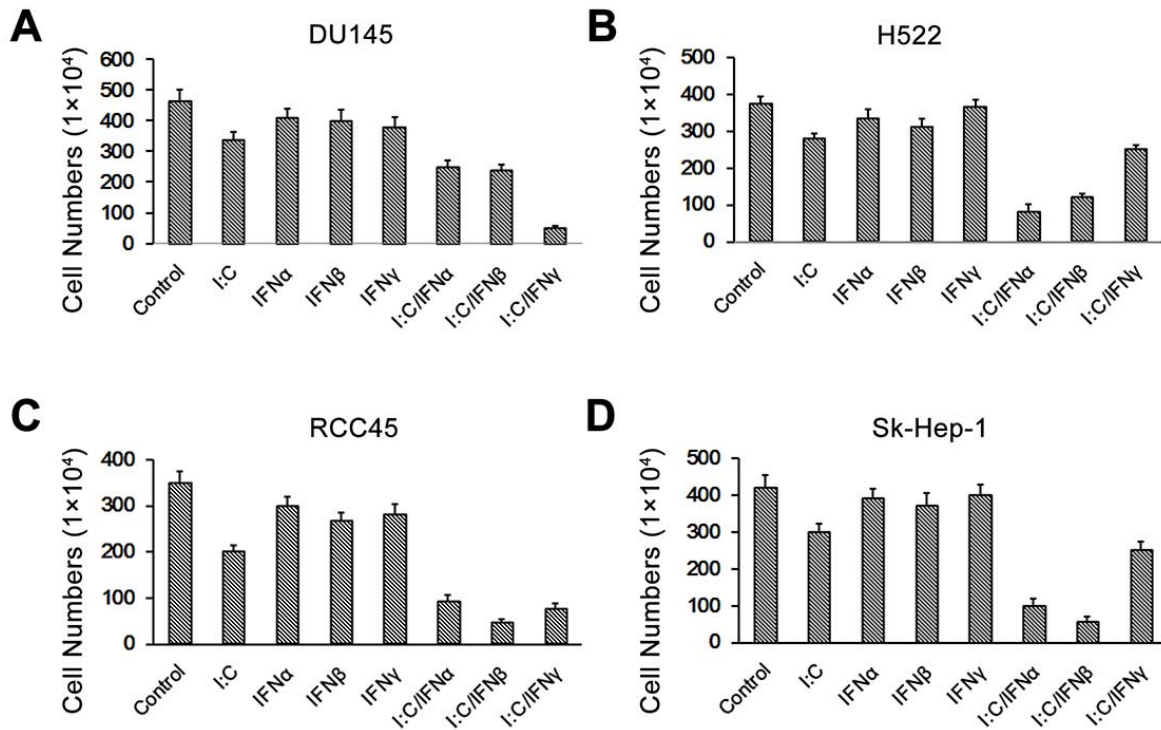

**Supplementary Figure S1: Effect of poly I:C and IFNs on different cancer cell viability.** Cancer cells were treated with 1,000 unit/ml human IFN  $\alpha$ ,  $\beta$  or  $\gamma$  overnight and transfected with and without 1  $\mu$ g/ml poly I:C in the presence of lipofectamine. After incubation for 48 hours, the viable cells were analyzed by trypan blue exclusion assays and the cell numbers were averaged from two independent experiments. **A.** DU145 cells; **B.** H522 cells; **C.** RCC45 cells and **D.** Sk-Hep-1 cells. Error bars represent  $\pm$  SEM.

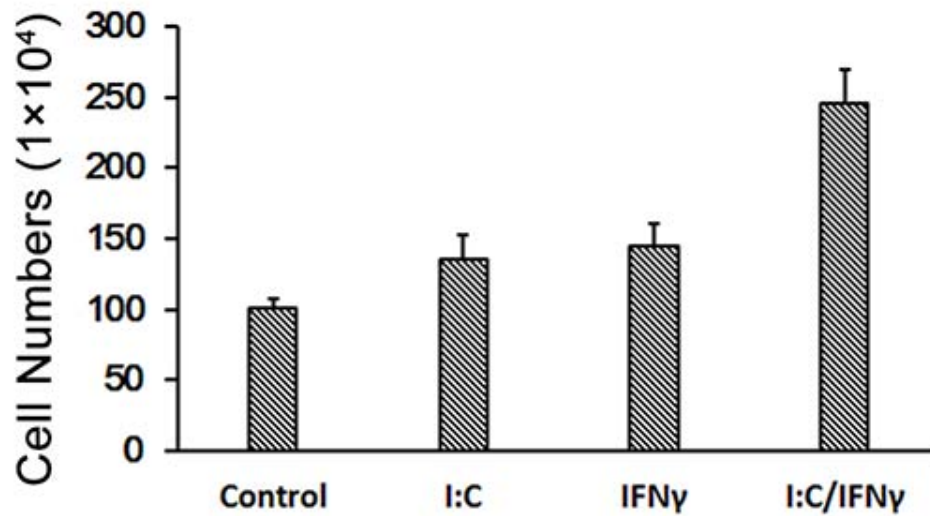

**Supplementary Figure S2: Poly I:C and IFN  $\gamma$ -induced Caspase 3 activity in DU145 cells.** DU145 cells were treated 1  $\mu$ g/ml of poly I:C, 1,000 units of IFN  $\gamma$  alone, or a combination of both in the presence of lipofectamine for 24 hours. The activity of caspase 3 was measured using a Caspase-GloTM 3/7 assay kit (Promega, Madison, WI). Experiments were performed two times in triplicates. Error bars represent  $\pm$  SEM.
